# Supplementary material for: Patient willingness, preferences and decision-making about planning for three complete cycles of IVF/ICSI treatment
Source: PubMed Central journal article supplement — Hum Reprod. 2021 Mar 21;36(5):1339–52. doi: 10.1093/humrep/deab040 (PMC8058595; doi:10.1093/humrep/deab040), 2021-03-21
Supplement: deab040_supplementary_table_s2.pdf [file deab040_supplementary_table_s2.pdf]

**Supplementary Table SII** Themes from the solutions provided by participants for overcoming the challenges of planning for multiple cycles of IVF/ICSI, the challenge they apply to and illustrative quotes.

| Theme                        | Challenge                                                  | Illustrative quotes                                                                  |
|------------------------------|------------------------------------------------------------|--------------------------------------------------------------------------------------|
| <b>Managing expectations</b> | Ability to afford multiple cycles                          | “reading up on “normal” side effects to know”. (P1, F, 37)                           |
|                              | Negative physical effect of treatment                      | “Google, research” (P97, F, 33)                                                      |
|                              | Burden of treatment on relationship                        | “Spirit of optimism” (P255, M, 40)                                                   |
|                              | Stressful interactions with staff                          | “Understanding the success rates” (P124, M, 31)                                      |
|                              | Coping with the possibility that the cycle is unsuccessful | “being realistic in your expectations” (P58, F, 26)                                  |
|                              | Negative emotional effect of treatment                     | “ask my facility about success rates” (P289, F, 31)                                  |
|                              | Not knowing how body will react                            | “Hope and research” (P276, F, 32)                                                    |
|                              | Not knowing the chances of pregnancy with another cycle    |                                                                                      |
| <b>Modifiable factors</b>    | Negative effect of treatment on work/daily activities      | “Savings, delay building our house, credit cards/loan as a last resort” (P16, F, 26) |
|                              | Ability to afford multiple cycles of treatment             | “Use savings” (P17, F, 36)                                                           |
|                              |                                                            | “Start saving as much money as possible” (P88, F, 33)                                |
|                              |                                                            | “Cut back massively and save” (P189, F, 32)                                          |
|                              |                                                            | “Arrange schedule with work to avoid added stress” (P124, M, 31)                     |
|                              |                                                            | “reduce working time” (P137, F, 29)                                                  |
| <b>Self-care</b>             | Negative physical effect of treatment                      | “Self-care and time for myself during treatment” (P66, F, 32)                        |
|                              | Burden of treatment on relationship                        | “Practice mindfulness” (P83, F, 28)                                                  |
|                              | Negative impact on work and daily activities               | “Getting in best physical and mental shape” (P117, F, 30)                            |
|                              | Not knowing how body will react                            | “Make time to spend quality time together” (P101, F, 25)                             |
|                              |                                                            | “try to keep as active as possible” (P98, F, 32)                                     |
| <b>Communication</b>         | Burden of treatment on relationship                        | “Be as open with each other as possible—it’s a 2-person journey” (P269, F, 34)       |
|                              | Stressful interactions with staff                          | “Communication is key” (P304, M, 37)                                                 |
|                              | Negative effect of treatment on work/daily activities      | “Be open with manager” (P101, F, 25)                                                 |
|                              | Coping with the possibility that the cycle is unsuccessful | “Communicate with partner friends and family” (P111, M, 37)                          |
|                              | Negative emotional effect of treatment                     |                                                                                      |
| <b>Support</b>               | Burden of treatment on relationship                        | “Talking, counselling” (P305, F, 38)                                                 |
|                              | Negative effect of treatment on work/daily activities      | “potential use of counselling” (P201, F, 30)                                         |
|                              | Coping with the possibility that the cycle is unsuccessful | “Talk with friends and gain as much info/knowledge from forums etc” (P269, F, 36)    |
|                              | Negative emotional effect of treatment                     | “Speak to those who have been through it before” (P64, F, 38)                        |

Note: P = Participant, F = Female, M = Male.
